# Supplementary material for: A zwitterionic triphosphenium compound as a tunable multifunctional donor
Source: Royal Society of Chemistry journal article supplement (doi:10.1039/c5dt03915k), 2015-11-30
Supplement: c5dt03915k1.pdf [file c5dt03915k1.pdf]

## Supplementary Information

# A Zwitterionic Triphosphenium Compound as a Tunable Multifunctional Donor

*Stephanie C. Kosnik and Charles L. B. Macdonald\**

|                                                                                   |    |
|-----------------------------------------------------------------------------------|----|
| Fig 1. $^{31}\text{P}$ $\{^1\text{H}\}$ NMR of 1 .....                            | 2  |
| Fig. 2 $^1\text{H}$ NMR of 1 .....                                                | 3  |
| Fig. 4 $^1\text{H}$ NMR of 2 .....                                                | 4  |
| Fig. 5 $^{31}\text{P}$ $\{^1\text{H}\}$ NMR of 3 .....                            | 5  |
| Fig. 6 $^1\text{H}$ NMR of 3 .....                                                | 5  |
| Fig. 7 $^{31}\text{P}$ NMR of the reaction with 1 eq. HOTf .....                  | 7  |
| Fig. 8 $^{31}\text{P}$ $\{^1\text{H}\}$ NMR of the reaction with 1 eq. HOTf ..... | 8  |
| Fig. 9 $^1\text{H}$ NMR of the reaction with 1 eq. HOTf.....                      | 8  |
| Fig. 10 $^{31}\text{P}$ $\{^1\text{H}\}$ NMR of the reaction with 2 eq. HOTf..... | 9  |
| Fig. 11 $^{31}\text{P}$ NMR of the reaction with 2 eq. HOTf.....                  | 9  |
| Fig. 12. HMQC of 1. ....                                                          | 10 |
| Fig. 13. HMBC of 1.....                                                           | 11 |

Fig. 14 Cyclic Voltammogram of  $K^+ (Ph_2P)_3(C_5H_2)$  ..... 11

Fig. 15 Cyclic Voltammogram of  $[dppeP][Br]$  ..... 11

Fig. 16 NBO Charges and selected bond lengths of **1'** (above) and **1** (below)..... 40

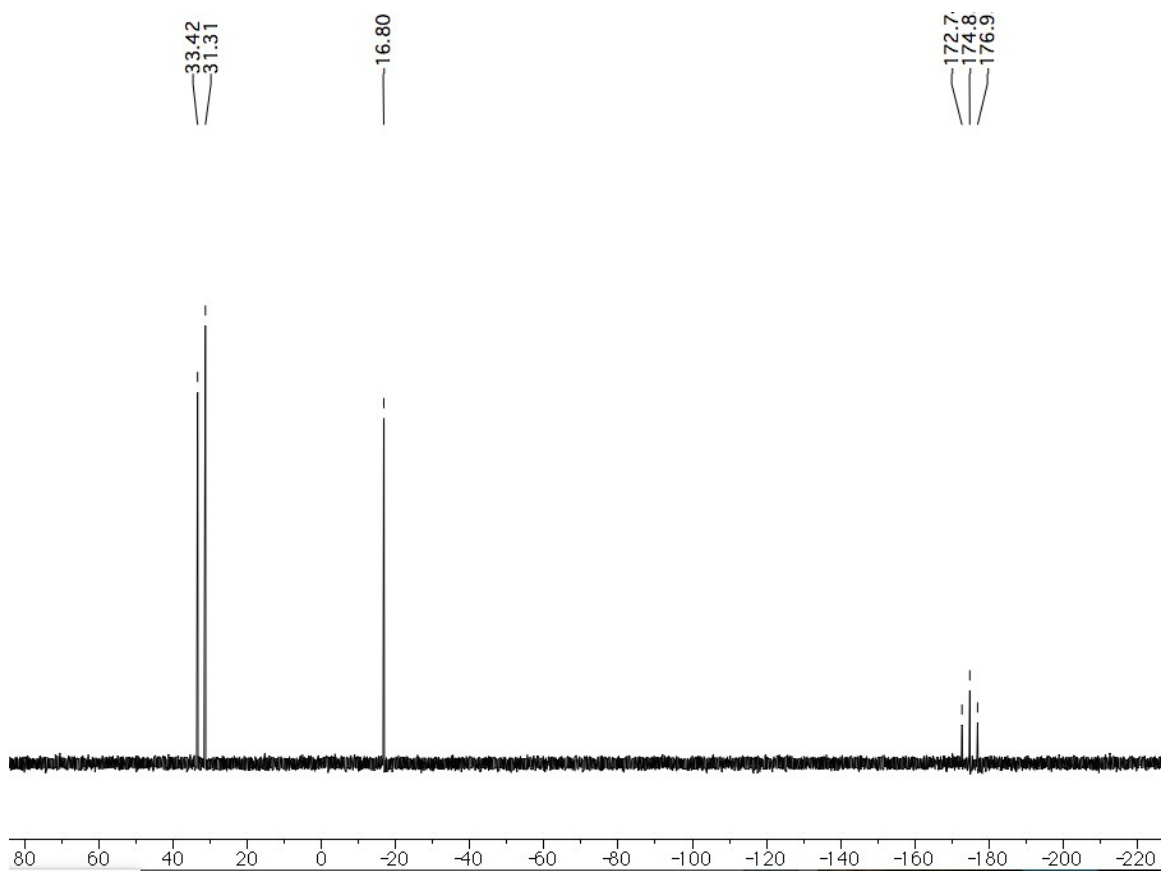

**Fig 1.  $^{31}P$   $\{^1H\}$  NMR of **1****

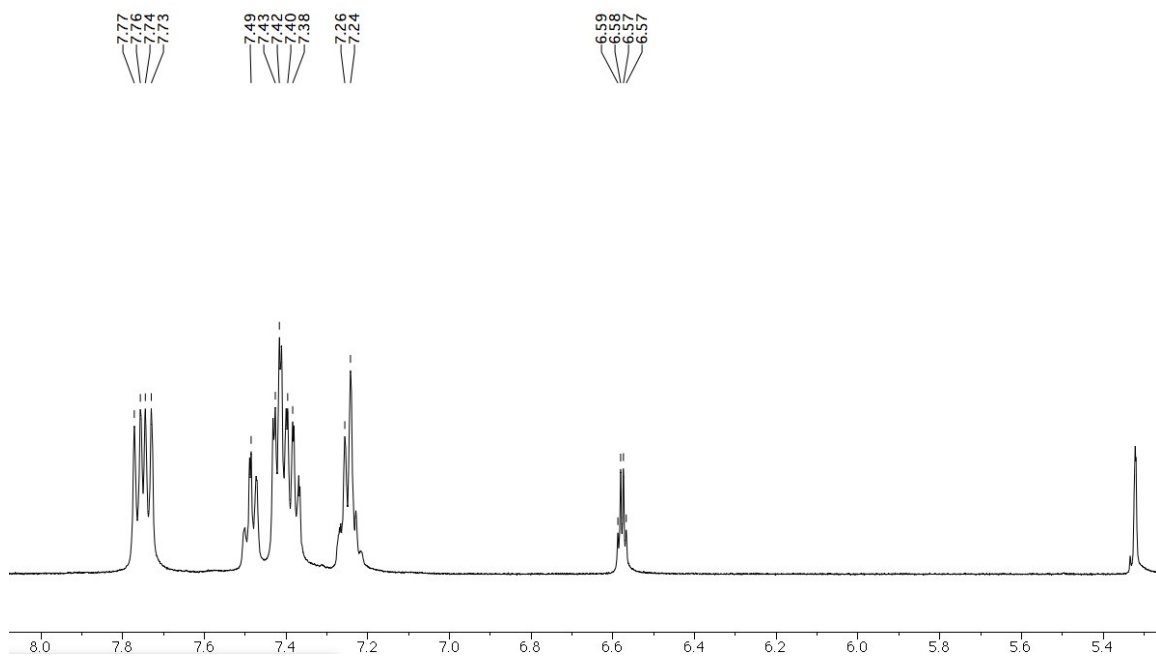

**Fig. 2  $^1\text{H}$  NMR of 1**

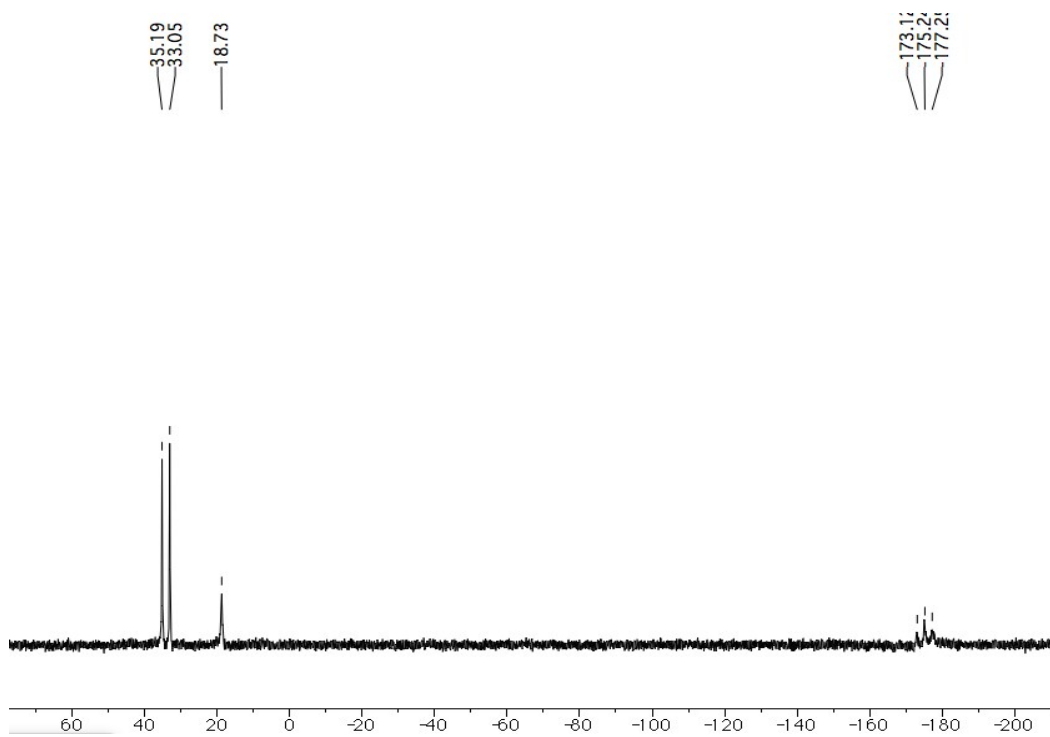

**Fig. 3  $^{31}\text{P}$   $\{^1\text{H}\}$  NMR of 2**

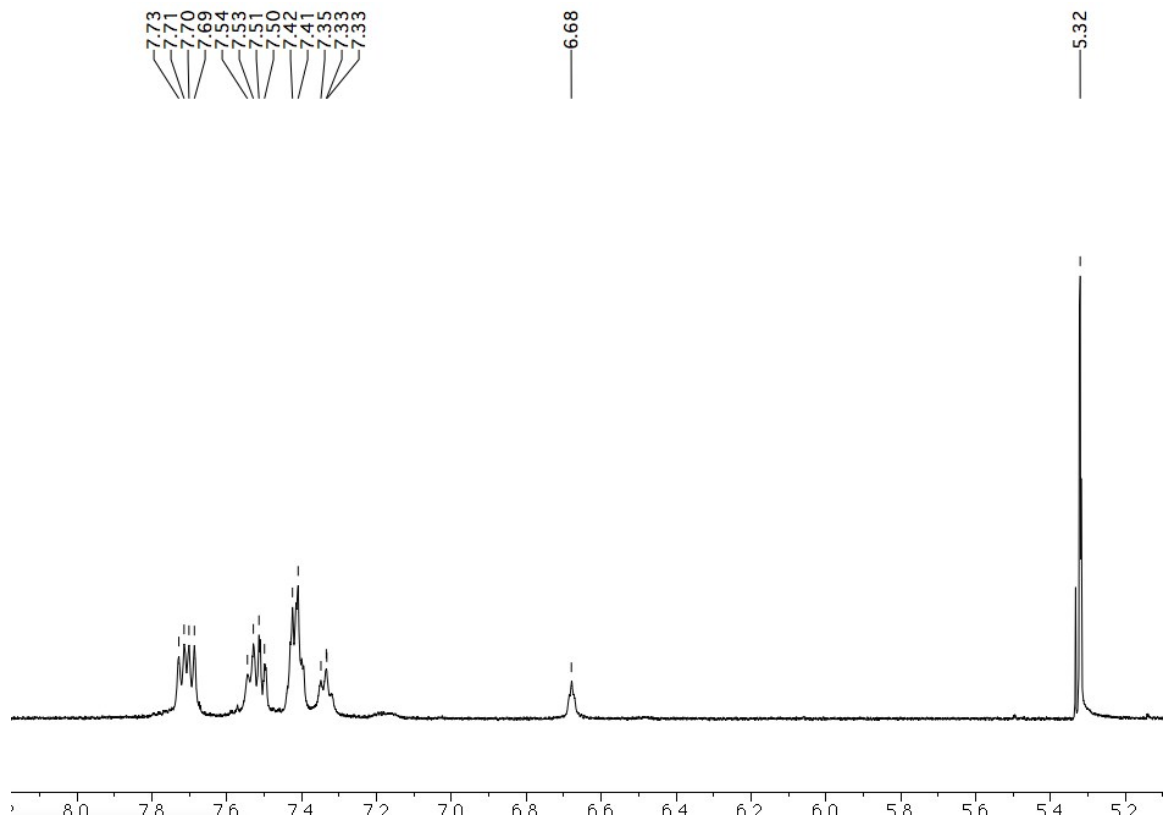

**Fig. 4**  $^1\text{H}$  NMR of **2**

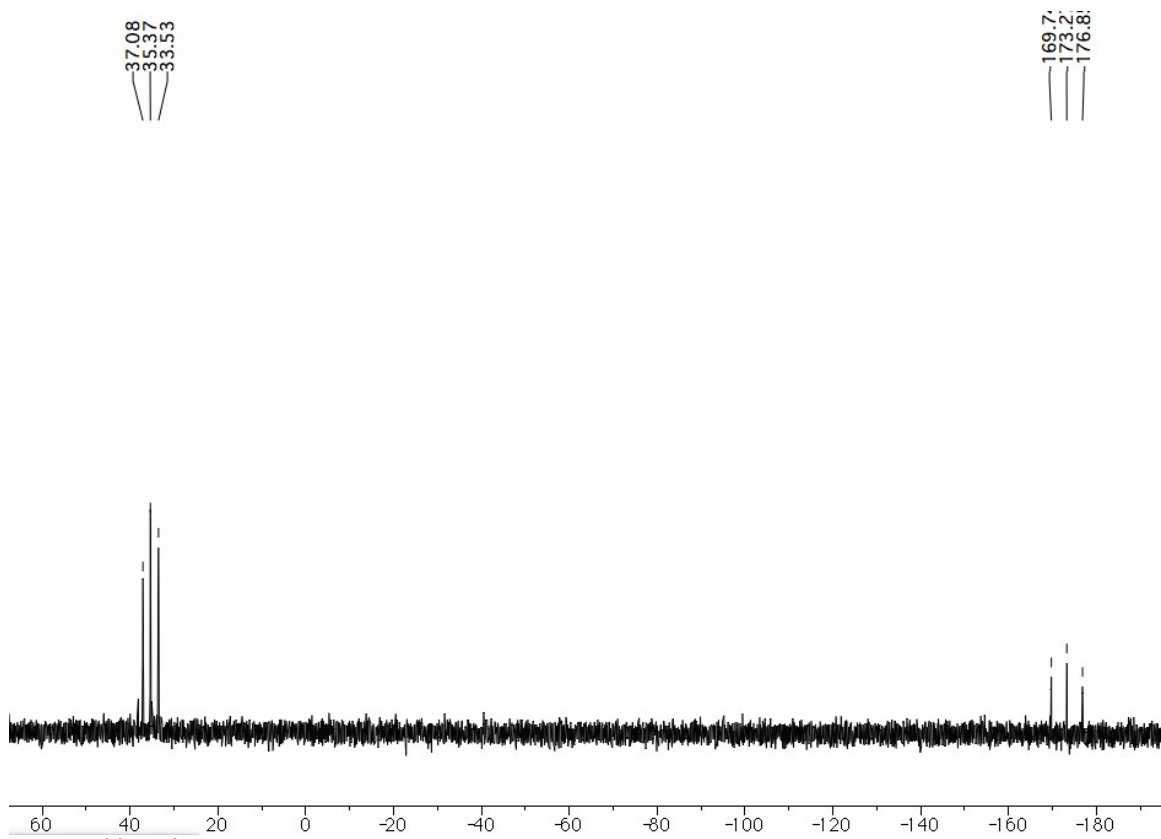

Fig. 5  $^{31}\text{P}$   $\{^1\text{H}\}$  NMR of 3

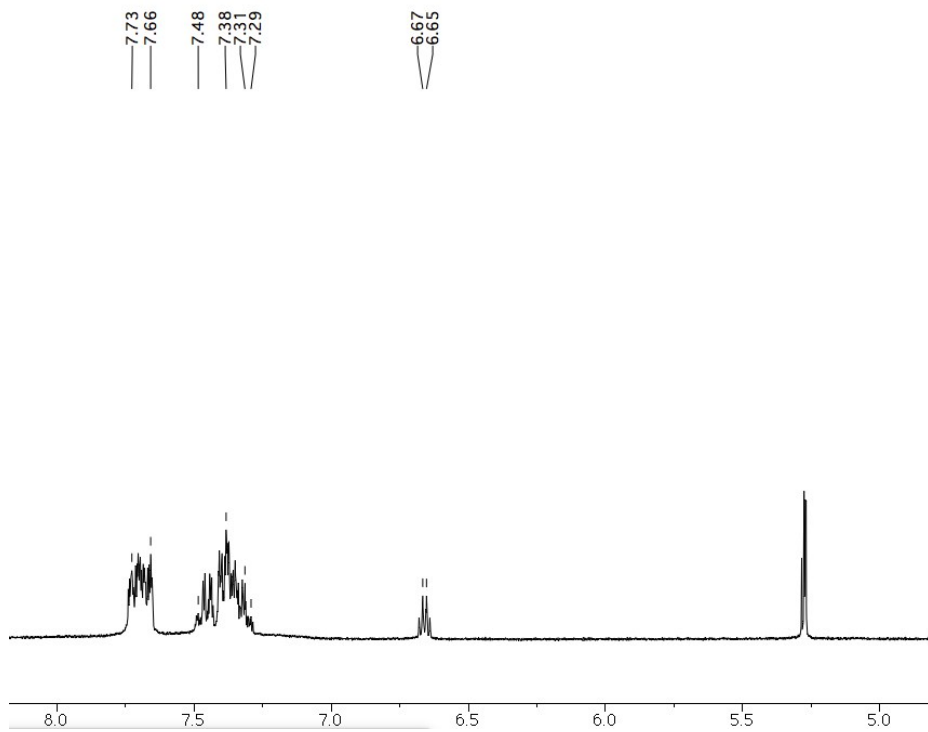

Fig. 6  $^1\text{H}$  NMR of 3

### Experimental Procedure NMR Reactions with Triflic Acid

To a Schlenk flask containing **1** (0.200g, 0.39 mmol) in dichloromethane, was added 1 stoichiometric equivalent of triflic acid via syringe (0.058g, 0.39 mmol). There is no colour change upon addition, however the reaction can be tracked by  $^{31}\text{P}$  NMR; after stirring for five minutes the reaction is complete.  $^{31}\text{P}\{^1\text{H}\}$  NMR:  $\delta$  35.17 (d,  $^1J_{\text{P-P}}=443$  Hz), -4.2 (s), -178.0 (t,  $^1J_{\text{P-P}}=437$  Hz).  $^{31}\text{P}$  NMR:  $\delta$  35.2 (d,  $^1J_{\text{P-P}}=445$  Hz), -4.15 (d,  $^1J_{\text{P-H}}=500$  Hz), -178.0 (t,  $^1J_{\text{P-P}}=445$  Hz).  $^1\text{H}$  NMR:  $\delta$  8.60 (d,  $^1J_{\text{P-H}}=498$  Hz, 1H, P-H), 7.8-7.4 (m, 30H, Ph), 6.82 (*pseudo-q*,  $^2J_{\text{P-H}}=3.5$  Hz,  $^3J_{\text{P-H}}=3.5$  Hz, 2H,  $\text{C}_5\text{H}_2$ ).

To an NMR tube containing **1** in  $\text{CD}_2\text{Cl}_2$ , was added one drop of triflic acid syringe. There is no colour change upon addition, and due to the instability of this molecule, however the NMR spectra were collected immediately upon addition.  $^{31}\text{P}\{^1\text{H}\}$  NMR:  $\delta$  35.17 (d,  $^1J_{\text{P-P}}=443$  Hz), -4.2 (s), -178.0 (t,  $^1J_{\text{P-P}}=437$  Hz).  $^{31}\text{P}$  NMR:  $\delta$  35.2 (d,  $^1J_{\text{P-P}}=445$  Hz), -4.15 (d,  $^1J_{\text{P-H}}=500$  Hz), -178.0 (t,  $^1J_{\text{P-P}}=445$  Hz).  $^1\text{H}$  NMR:  $\delta$  11.2 (b,  $^1J_{\text{P-H}}$  unresolved, 1H, P-H), 8.60 (d,  $^1J_{\text{P-H}}=500$  Hz, 1H, P-H), 8.8-7.1 (m, 30H, Ph), 6.82 (*pseudo-q*,  $^2J_{\text{P-H}}=3.5$  Hz,  $^3J_{\text{P-H}}=3.5$  Hz, 2H,  $\text{C}_5\text{H}_2$ ). Excess triflic acid is visible in the spectrum.

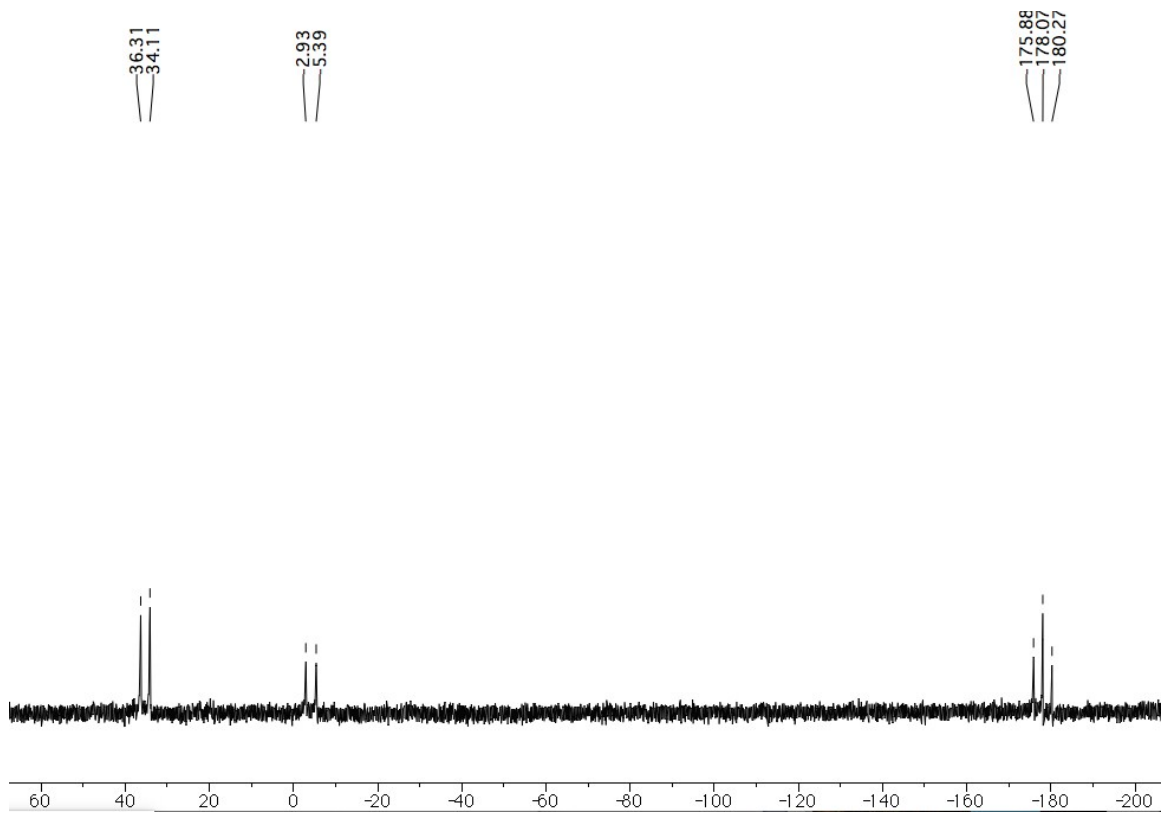

**Fig. 7**  $^{31}\text{P}$  NMR of the reaction with 1 eq. HOTf

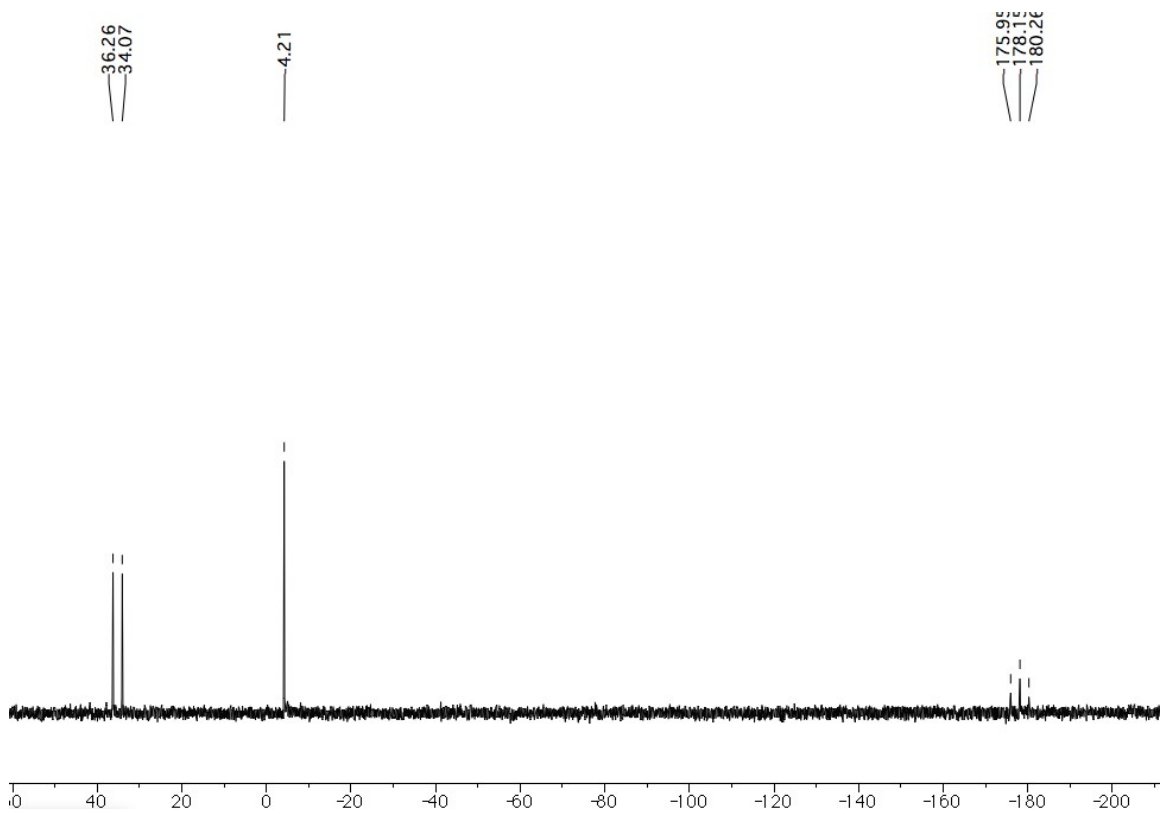

**Fig. 8  $^{31}\text{P}$   $\{^1\text{H}\}$  NMR of the reaction with 1 eq. HOTf**

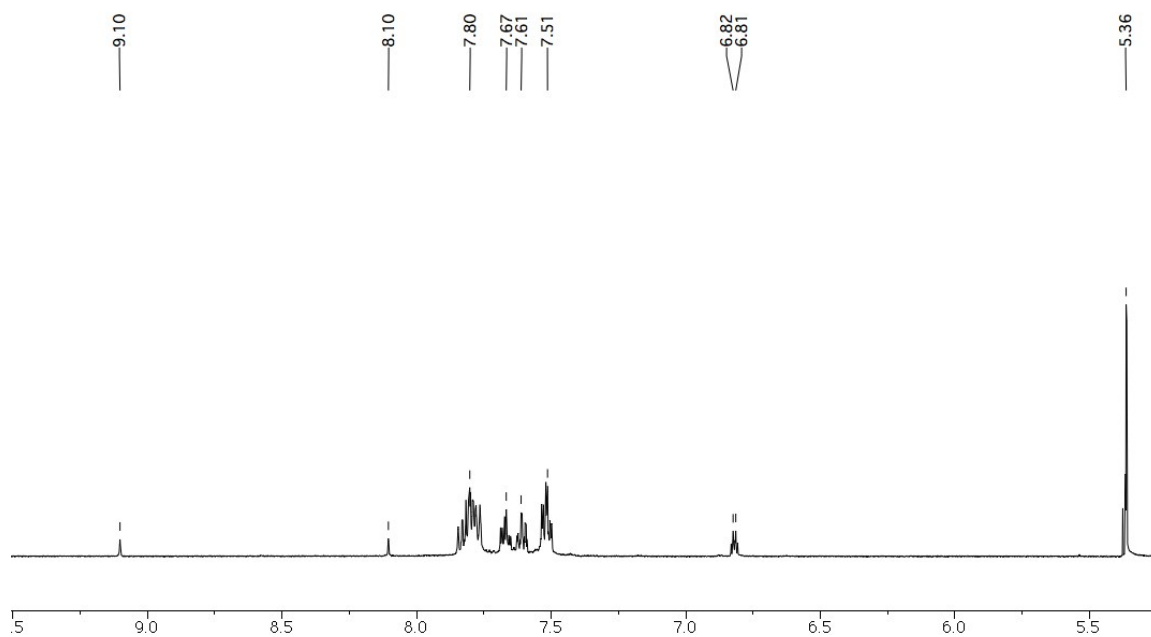

**Fig. 9  $^1\text{H}$  NMR of the reaction with 1 eq. HOTf**

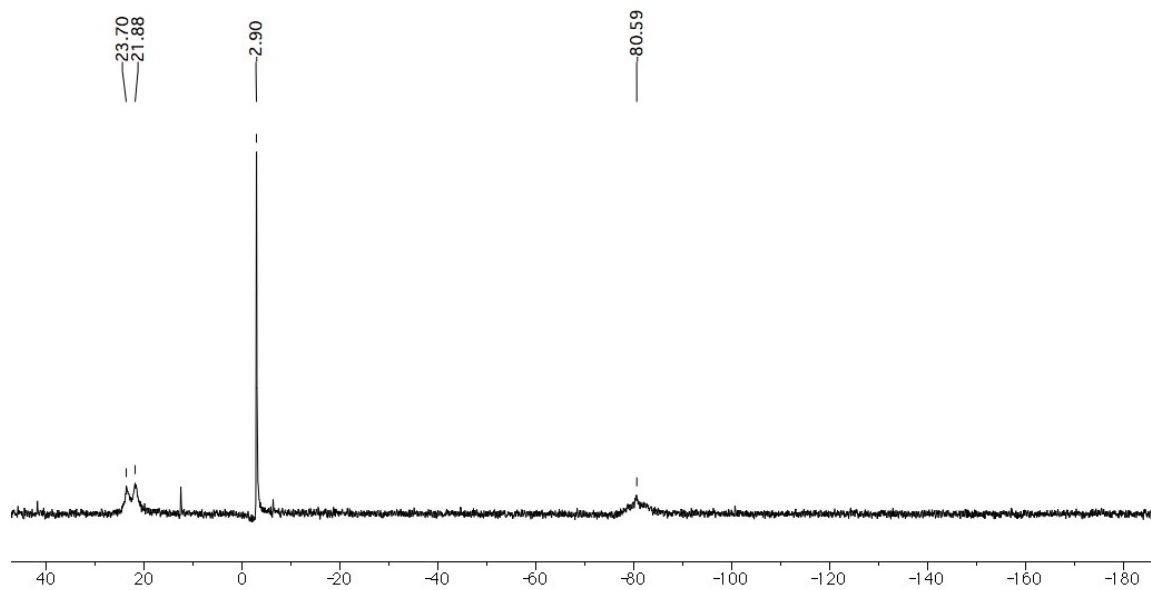



**Fig. 10**  $^{31}\text{P}$   $\{^1\text{H}\}$  NMR of the reaction with 2 eq, HOTf

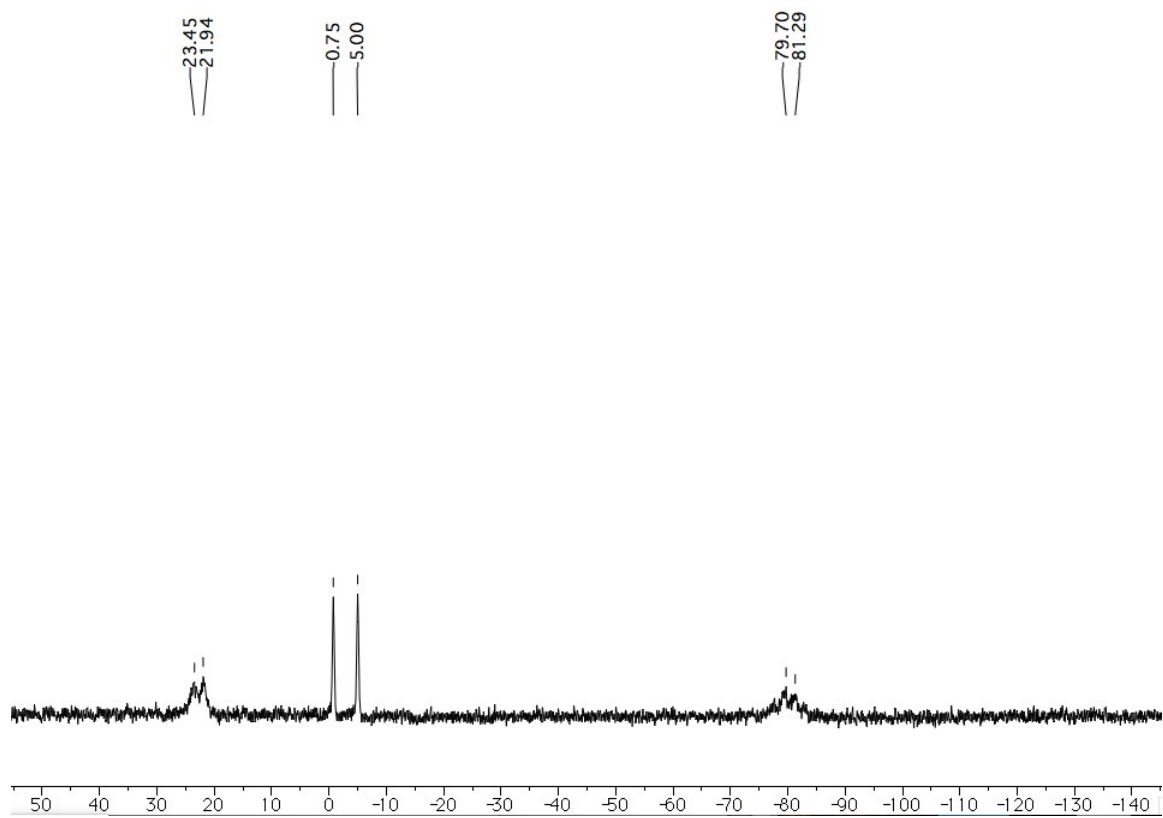

**Fig. 11**  $^{31}\text{P}$  NMR of the reaction with 2 eq. HOTf

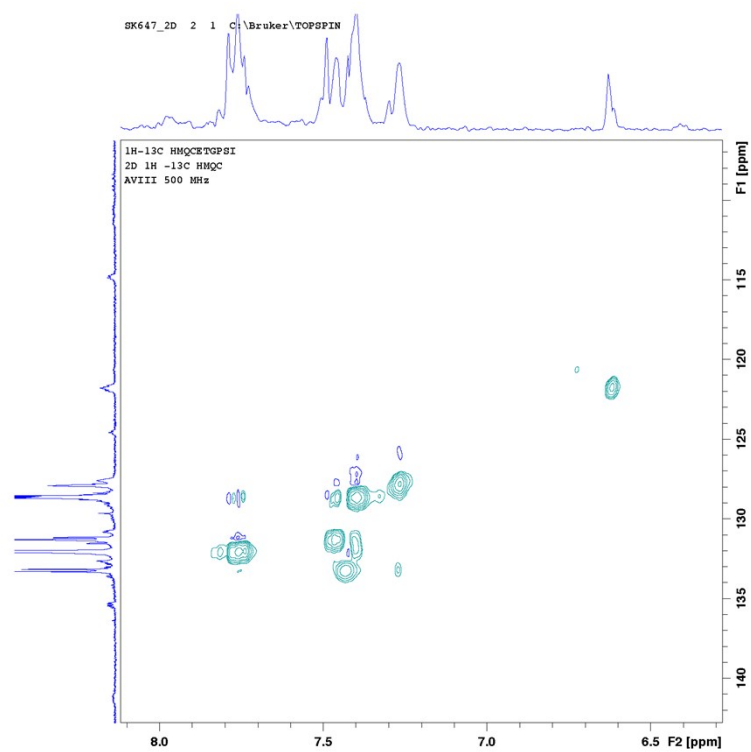

Fig. 12. HMQC of 1.

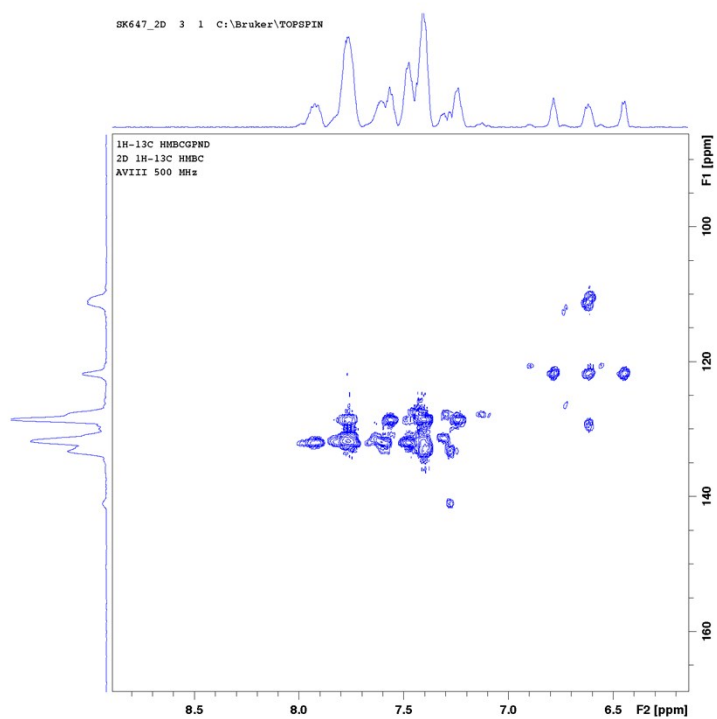

**Fig. 13. HMBC of 1.**

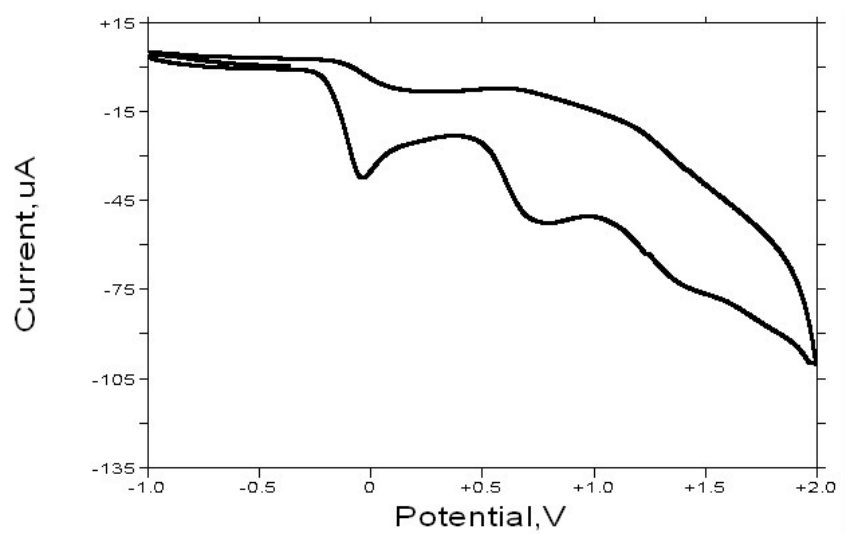

**Fig. 14 Cyclic Voltammogram of  $K^+(Ph_2P)_3(C_5H_2)$**

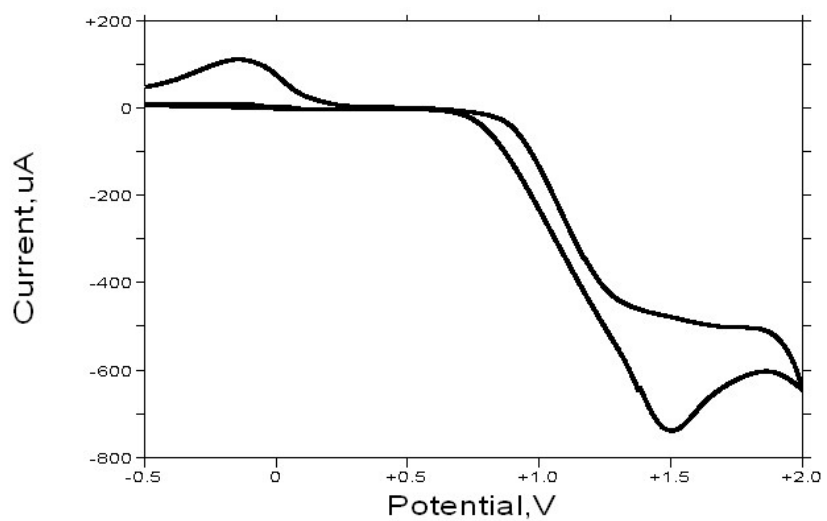

**Fig. 15 Cyclic Voltammogram of  $[dppeP][Br]$**

## Computational Investigations

All of the computational investigations were performed using the **Compute Canada Shared Hierarchical Academic Research Computing Network (SHARCNET)** facilities ([www.sharcnet.ca](http://www.sharcnet.ca)) with the Gaussian09<sup>1</sup> program suites. Geometry optimizations have been calculated using density functional theory (DFT), specifically implementing the M062X method<sup>2</sup> ENREF\_60 in conjunction with the TZVP basis set<sup>3</sup> for all atoms. The geometry optimizations were not subjected to any symmetry restrictions and each stationary point was confirmed to be a minimum having zero imaginary vibrational frequencies. Pictures of the optimized structures were prepared using Gaussview 3.0.<sup>4</sup> Population analyses were conducted using the Natural Bond Orbital (NBO)<sup>5</sup> implementation included with the Gaussian package. Plots of molecular orbitals and electrostatic potentials were generated at the M062X/TZVP level of theory and examined using ADF2014.<sup>6-8</sup> Summaries of the optimized structures, including electronic energies and Cartesian components for each of the atoms, are detailed in the sections below.

## $P(Ph_2P)_2C_5H_2PPh_2$ model

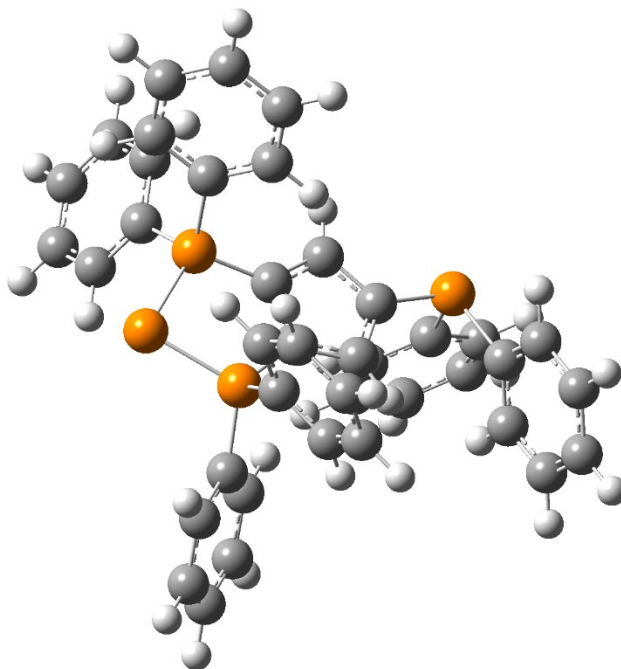

1\1\GINC-SAW327\FOpt\RM062X\TZVP\C41H32P4\CMACD\27-Sep-2015\0\#\nM062x

```
/TZVP scf=tight opt freq pop=(full,nbo6read) test\Optimization of [P(Cp(PPh2)3)] zwitterion\n0,1\P,-2.9211199523,0.834087637,1.4334238066\P,-0.9412033727,1.6324189344,1.0587416962\P,-2.5160973192,-0.7469975196,0.0050033558\C,-0.0626674496,0.4266985006,0.1164905882\C,-0.9578589701,3.2338523384,0.1668409453\C,-0.0620352197,1.9938256715,2.616410485\C,-0.7886734998,-0.7030515129,-0.3456645274\C,1.2439666073,0.3394090199,-0.3692409495\C,-2.0582318248,3.5899800468,-0.6057589301\C,0.1779441789,4.0432577309,0.1824781429\C,-0.3983050861,3.1228593047,3.3618663225\C,0.9138472549,1.1150978201,3.0767229117\C,-3.4566024666,-0.5502320259,-1.5519847551\C,-3.038356766,-2.3742704645,0.6592317878\C,0.0676593662,-1.4767053085,-1.1334755402\C,1.3268946111,-0.8418002642,-1.133398575\H,2.0486927656,1.0397440908,-0.1963445719\H,-2.9381946254,2.9563073964,-0.6093367978\C,-2.0226105569,4.75545669,-1.3612828137\C,0.2077099
```

809,5.2049084625,-0.5745721214\H,1.0374455145,3.7654626365,0.781893708  
4\H,-1.1507058157,3.8127032525,2.9957338777\C,0.2416029471,3.368635104  
2,4.5674698834\C,1.5551755624,1.3707482419,4.2819115458\H,1.1726465515  
,0.2437430576,2.4861858909\C,-2.8060833354,-0.0775445518,-2.687861759\  
C,-4.8297464052,-0.7917060795,-1.5805073666\C,-3.0706834897,-2.5915753  
39,2.0336354327\C,-3.3203059572,-3.4189504414,-0.2203844642\H,-0.17692  
00245,-2.4010600662,-1.6377920944\P,2.7972217363,-1.5444724288,-1.9445  
762692\H,-2.8806410381,5.0331486596,-1.9603433707\C,-0.8928778143,5.56  
18761554,-1.3457167794\H,1.0912544802,5.83042907,-0.5643522727\H,-0.01  
94799834,4.2448318852,5.1471560493\C,1.2198481409,2.4936839097,5.02646  
07258\H,2.3209662208,0.6923863544,4.6358949524\H,-1.7375874128,0.10523  
09854,-2.6579729651\C,-3.531141784,0.1459894072,-3.8524245712\C,-5.546  
4607879,-0.5684515243,-2.7457009657\H,-5.336687322,-1.1572590907,-0.69  
40299737\H,-2.8459394532,-1.7750275489,2.7098195133\C,-3.3895380498,-3  
.8500190652,2.5255988748\C,-3.632306042,-4.6756298041,0.27802841\H,-3.  
2993833507,-3.2507995582,-1.2906897062\C,3.9159755579,-0.0670447233,-1  
.868319689\C,3.5276066004,-2.5782482676,-0.5900313704\H,-0.8683089024,  
6.4703008774,-1.9345518098\H,1.7228277505,2.6904180902,5.9648411365\H,  
-3.0239710999,0.5082354369,-4.737667318\C,-4.8967307314,-0.099434611,-  
3.882869341\H,-6.6118414509,-0.7593491254,-2.7679812346\H,-3.418607256  
8,-4.0167373754,3.5948027903\C,-3.6697695591,-4.8907136398,1.650242974  
6\H,-3.8473961129,-5.4868056609,-0.4057991239\C,3.82826217,0.854144176  
2,-2.9130958636\C,4.8041196944,0.186433026,-0.8248388331\C,4.714687228  
5,-3.2603766677,-0.8646975118\C,2.9386672475,-2.7313794748,0.662642686  
6\H,-5.4572361237,0.0732258508,-4.7930518933\H,-3.9173009661,-5.871442  
9762,2.0367399578\H,3.1464761206,0.6635525418,-3.7348716609\C,4.597912  
4859,2.009134586,-2.9089610502\C,5.5837859804,1.337539648,-0.825008928

8\H,4.8889633864,-0.5164851788,-0.0049095819\H,5.1746271812,-3.1585520  
654,-1.8424642677\C,5.3150093993,-4.0573282219,0.0988722818\C,3.532059  
1823,-3.5430972621,1.624137082\H,2.0102956006,-2.216141901,0.881966949  
1\H,4.514987843,2.7155097407,-3.7258032135\C,5.4809468347,2.2527875744  
,-1.8637284293\H,6.2715649943,1.5191864941,-0.0080632946\H,6.240278159  
6,-4.5730894715,-0.1267368195\C,4.7223209232,-4.2017866342,1.348560517  
\H,3.061595633,-3.6595632564,2.5932159771\H,6.0893090244,3.1487825201,  
-1.8621745438\H,5.1834714612,-4.8308748191,2.0997776595\\Version=EM64L  
-G09RevD.01\State=1-A\HF=-2946.8123065\RMSD=8.832e-09\RMSF=3.559e-  
06\D

ipole=-1.2561629,0.8157063,0.651361\Quadrupole=-5.8192006,5.4552799,0.  
3639207,11.5610741,15.2381986,-6.3113191\PG=C01 [X(C41H32P4)]\@

Zero-point correction= 0.609013 (Hartree/Particle)

Thermal correction to Energy= 0.648296

Thermal correction to Enthalpy= 0.649240

Thermal correction to Gibbs Free Energy= 0.530634

Sum of electronic and zero-point Energies= -2946.203293

Sum of electronic and thermal Energies= -2946.164010

Sum of electronic and thermal Enthalpies= -2946.163066

Sum of electronic and thermal Free Energies= -2946.281672

## **P(H<sub>2</sub>P)<sub>2</sub>C<sub>5</sub>H<sub>2</sub>PH<sub>2</sub> model**

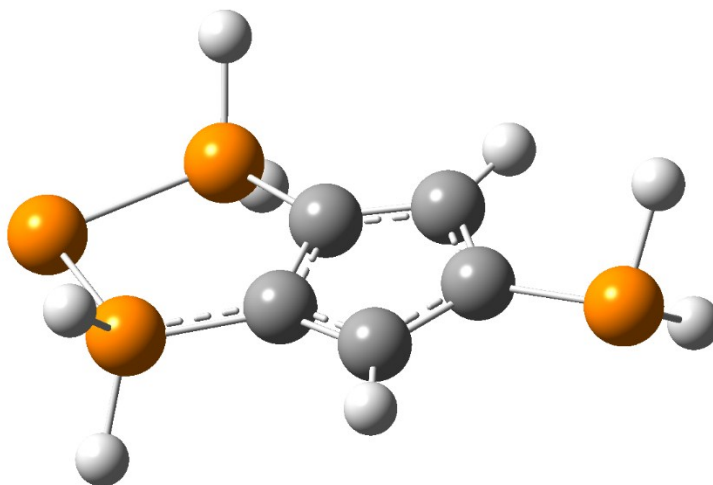

1\1\GINC-SAW4\FOpt\RM062X\TZVP\C5H8P4\CMACD\24-Sep-2015\0\#\nM062x/TZV

P scf=tight opt freq pop=(full,nbo6read) test\Optimization of [P(Cp(P  
H2)3)] zwitterion\0,1\P,2.86997314,9.3740472681,2.2218873018\P,2.7078  
967572,9.3749604278,0.0603952697\P,1.5293491258,11.1878267994,0.230191  
002\C,2.0347498131,10.7812355478,2.8667443364\C,1.3443687388,11.600442  
1153,1.926617899\C,1.8044908036,11.2935322211,4.1429900725\C,0.7172064  
328,12.6290916635,2.6333972511\C,0.9953223275,12.4377440808,3.99876276  
4\H,2.1758102485,10.8961899816,5.0759352336\H,0.122060813,13.430360741  
8,2.2205898677\P,0.3564650217,13.5594696255,5.2934327214\H,2.089259065  
1,12.2519056908,-0.5066597169\H,0.2793506355,11.0665894559,-0.41061508  
86\H,4.2109481925,9.3331138145,2.6549236451\H,2.3830809847,8.179684440  
6,2.7918645679\H,1.554787459,13.7332958818,6.0347297266\H,-0.153670668  
9,12.5839757339,6.1906245368\Version=EM64L-G09RevD.01\State=1-A\HF=-1  
560.5791398\RMSD=9.084e-09\RMSF=1.090e-05\Dipole=0.5380138,-0.8968668,  
-0.7518569\Quadrupole=-0.8572646,-1.6071945,2.4644591,-0.8065183,6.018







## Kohn-Sham Orbitals

LUMO

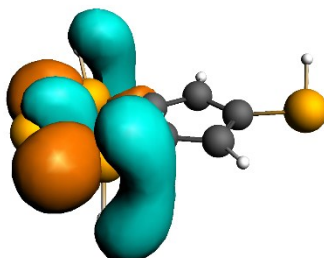

HOMO

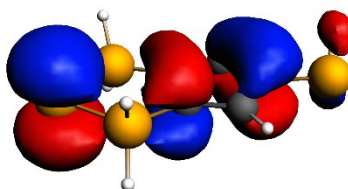

HOMO-1

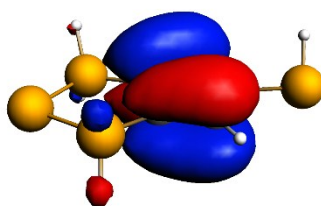

HOMO-2

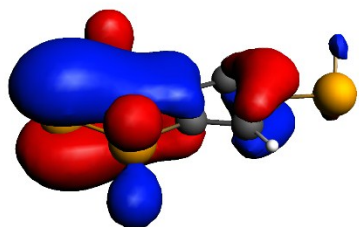

**HOMO-3**

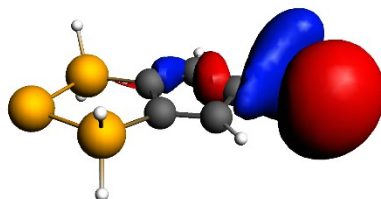

**HOMO-4**

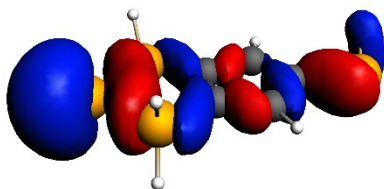

**[P(H<sub>2</sub>P)<sub>2</sub>C<sub>5</sub>H<sub>2</sub>PH<sub>3</sub>] cation model**

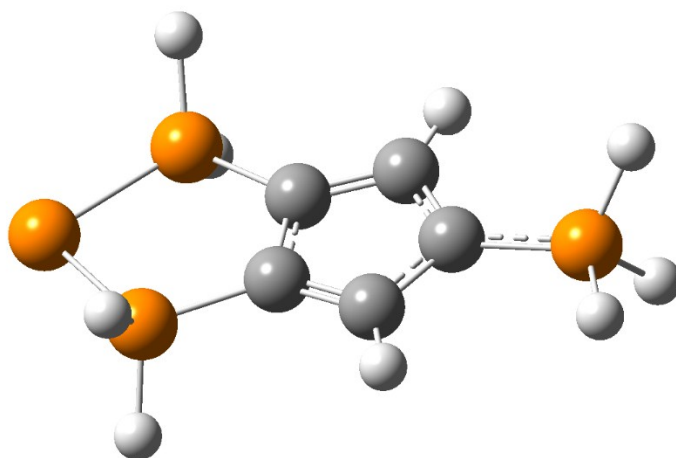

1\1\GINC-SAW213\FOpt\RM062X\TZVP\C5H9P4(1+)\CMACD\25-Sep-2015\0\#\# M06

2x/TZVP scf=tight opt freq pop=(full,nbo6read) test\Optimization of H

[P(Cp(PH<sub>2</sub>)<sub>3</sub>)] H-P(III) cation\1,1\P,-1.5628611396,1.5134534463,0.0078  
256358\P,-3.121587693,0.011415822,-0.0259080124\P,-1.5830488364,-1.512  
7250459,-0.0135027377\C,0.0216226326,0.6999370936,-0.0001743816\C,0.01  
09748342,-0.7215542511,-0.0111075927\C,1.3327578286,1.1437373135,0.014  
3688908\C,1.317511136,-1.1798908434,-0.0032994787\C,2.1354724572,-0.02  
28365052,0.0141249713\H,1.6756841979,2.1671454847,0.0263490255\H,1.652  
336091,-2.2061713532,-0.0065410549\P,3.8790145956,-0.0763297965,-0.005  
5576163\H,-1.6643498393,-2.3949794713,1.0798673745\H,-1.6626676225,-2.  
3988175181,-1.1034795348\H,-1.6292526435,2.3818405911,1.1131385951\H,-  
1.6265571119,2.4155721535,-1.0699818281\H,4.5070888368,0.6216300765,1.  
0380940164\H,4.4953490156,0.4220429705,-1.1649136501\H,4.3158695204,-1  
.400726227,0.1064949879\Version=EM64L-G09RevD.01\State=1-A\HF=-1560.9  
414515\RMSD=5.846e-09\RMSF=3.722e-06\Dipole=3.1925595,-0.0579575,0.008

7366\Quadrupole=22.1261559,-2.2623484,-19.8638075,-0.6352519,-0.020189

8,0.1244438\PG=C01 [X(C5H9P4)]\ \@

Zero-point correction= 0.121741 (Hartree/Particle)

Thermal correction to Energy= 0.131775

Thermal correction to Enthalpy= 0.132719

Thermal correction to Gibbs Free Energy= 0.084400

Sum of electronic and zero-point Energies= -1560.819710

Sum of electronic and thermal Energies= -1560.809677

Sum of electronic and thermal Enthalpies= -1560.808733

Sum of electronic and thermal Free Energies= -1560.857052

### Electrostatic Potential

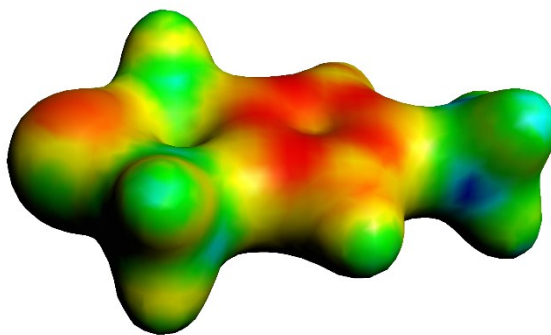

**[axial-HP(H<sub>2</sub>P)<sub>2</sub>C<sub>5</sub>H<sub>2</sub>PH<sub>2</sub>] cation model**

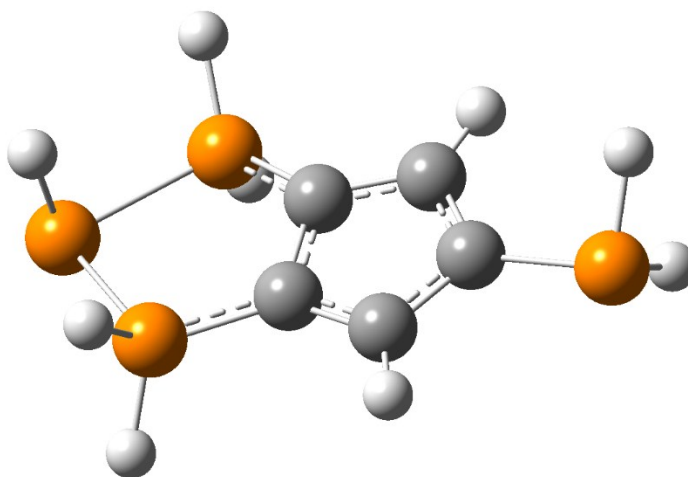

1\1\GINC-SAW130\FOpt\RM062X\TZVP\C5H9P4(1+)\CMACD\28-Sep-2015\0\#\# M06

2x/TZVP scf=tight opt=tight freq pop=(full,nbo6read) test\Optimizatio

n of H[P(Cp(PH<sub>2</sub>)<sub>3</sub>)] axial H-P(I) cation\1,1\P,-1.5146539311,1.5669269

826,-0.0333562831\P,-3.1069997374,0.0022614781,0.0616882689\P,-1.52047

45672,-1.57350062,0.0424785341\C,-0.0119643481,0.7166530924,0.13437640

13\C,-0.0167190719,-0.7162065652,-0.0322123297\C,1.3183207464,1.138392

771,0.1326838228\C,1.3161347935,-1.1370116746,-0.0651912109\C,2.134701

8875,-0.001536079,0.0269993723\H,1.6671855318,2.1582605904,0.199566755

1\H,1.6675381829,-2.1560340696,-0.1371430151\P,3.9757958638,-0.1084302

865,0.009721685\H,-1.768506602,-2.3885154246,1.1661892276\H,-1.8017084

473,-2.4246600111,-1.0397503816\H,-1.8115558562,2.5240452657,0.9535929

177\H,-1.7336410859,2.2598342139,-1.2390459225\H,4.2073515837,0.799504

2412,1.072750458\H,4.1922455112,0.8664220615,-0.997256647\H,-3.1297664

537,0.0411250337,1.4788483473\Version=EM64L-G09RevD.01\State=1-A\HF=-

1560.9264077\RMSD=5.380e-09\RMSF=1.095e-05\Dipole=-3.6300402,0.3059787

,0.1992868\Quadrupole=6.1550404,5.0750513,-11.2300917,2.8912412,-1.954

2039,-0.1425096\PG=C01 [X(C5H9P4)]\ \@

Zero-point correction= 0.119568 (Hartree/Particle)

Thermal correction to Energy= 0.130569

Thermal correction to Enthalpy= 0.131514

Thermal correction to Gibbs Free Energy= 0.079551

Sum of electronic and zero-point Energies= -1560.806840

Sum of electronic and thermal Energies= -1560.795838

Sum of electronic and thermal Enthalpies= -1560.794894

Sum of electronic and thermal Free Energies= -1560.846856



**[P(H<sub>2</sub>P)<sub>2</sub>C<sub>5</sub>H<sub>3</sub>PH<sub>2</sub>] cation model (isomer 1)**

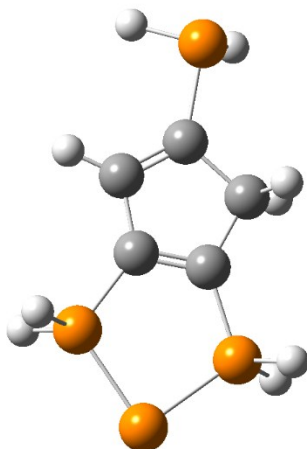

1\1\GINC-SAW298\FOpt\RM062X\TZVP\C5H9P4(1+)\CMACD\05-Oct-2015\0\#\#  
M06

2x/TZVP scf=tight opt=tight freq pop=(full,nbo6read) test\Optimizatio  
n of H[P(Cp(PH<sub>2</sub>)<sub>3</sub>)] axial H-Cp 1 cation\1,1\P,-1.6573767634,1.4964453  
423,0.0826449333\P,-3.1963932504,-0.012038042,-0.0854294412\P,-1.61487  
75328,-1.4911837593,-0.1446451613\C,-0.0418629671,0.6829551371,0.10433  
66645\C,-0.0357583888,-0.6608403619,0.011124922\C,1.3155357884,1.19970  
82333,0.1912295297\C,1.3871309557,-1.1343844416,0.0371747532\C,2.16999  
33962,0.1540032175,0.1424048273\H,1.5782739816,2.2442141558,0.27503378  
33\H,1.6529966931,-1.6982419399,-0.8630935111\P,3.9870403022,0.1613416  
336,0.3922898022\H,-1.6936712611,-2.4694233193,0.8634701338\H,-1.57431  
0623,-2.2727346498,-1.3148615593\H,-1.7248901712,2.3015035693,1.234275  
9465\H,-1.6148793866,2.4488646072,-0.9524899108\H,4.1874502519,1.49608  
78269,-0.0316028514\H,4.3119686938,-0.4230914997,-0.8571139358\H,1.586  
3890414,-1.7860895693,0.894298415\Version=EM64L-G09RevD.01\State=1-A\  
HF=-1560.9508734\RMSD=4.873e-09\RMSF=4.770e-06\Dipole=-0.3932632,-0.08  
8672,-0.3122051\Quadrupole=4.0761962,7.4207321,-11.4969283,0.3395187,-

1.8775741,1.7538689\PG=C01 [X(C5H9P4)]\ \@

Zero-point correction= 0.122695 (Hartree/Particle)

Thermal correction to Energy= 0.133552

Thermal correction to Enthalpy= 0.134497

Thermal correction to Gibbs Free Energy= 0.083735

Sum of electronic and zero-point Energies= -1560.828178

Sum of electronic and thermal Energies= -1560.817321

Sum of electronic and thermal Enthalpies= -1560.816377

Sum of electronic and thermal Free Energies= -1560.867139

**[P(H<sub>2</sub>P)<sub>2</sub>C<sub>5</sub>H<sub>3</sub>PH<sub>2</sub>] cation model (isomer 2)**

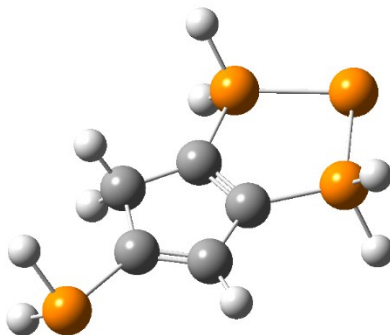

1\1\GINC-SAW125\FOpt\RM062X\TZVP\C5H9P4(1+)\CMACD\05-Oct-2015\0\#\#  
M06

2x/TZVP scf=tight opt=tight freq pop=(full,nbo6read) test\Optimizatio  
n of H[P(Cp(PH2)3)] axial H-Cp 2 cation\1,1\P,-1.6570074937,1.4941585  
307,0.00099662\P,-3.1975829368,-0.0276299867,-0.0160552714\P,-1.616929  
5979,-1.5030626743,-0.0037773246\C,-0.0484931906,0.6966021164,0.000201  
9572\C,-0.0227919317,-0.6493252539,-0.0006559181\C,1.3617962983,1.2064  
084297,0.0079674713\C,1.3555312493,-1.1304640877,0.0071636609\C,2.1780  
165092,-0.0624572162,0.0118611488\H,1.5758518137,1.8208606092,0.888903  
9561\H,1.6550865111,-2.1689990719,0.009743349\P,4.0218827755,-0.189836  
9816,0.0229888283\H,-1.6085268561,-2.3799562481,1.0966480876\H,-1.6040  
987332,-2.3864634878,-1.0986011947\H,-1.6956726498,2.3690925604,1.1027  
322026\H,-1.6928407511,2.3838540544,-1.0885285003\H,4.2165457295,0.805  
2480461,1.0164175336\H,4.2236637915,0.7185445484,-1.0480172262\H,1.585  
7500728,1.821047163,-0.8703415401\Version=EM64L-G09RevD.01\State=1-A\  
HF=-1560.9501681\RMSD=8.025e-09\RMSF=4.721e-06\Dipole=-0.6536597,0.465  
3677,-0.0076242\Quadrupole=2.7243097,6.9712329,-9.6955426,3.4817233,-0

.0855672,0.0880039\PG=C01 [X(C5H9P4)]\ \@

Zero-point correction= 0.122571 (Hartree/Particle)

Thermal correction to Energy= 0.132571

Thermal correction to Enthalpy= 0.133516

Thermal correction to Gibbs Free Energy= 0.086432

Sum of electronic and zero-point Energies= -1560.827597

Sum of electronic and thermal Energies= -1560.817597

Sum of electronic and thermal Enthalpies= -1560.816652

Sum of electronic and thermal Free Energies= -1560.863736

## $P(H_2P)_2C_5H_2P(O)H_2$ model

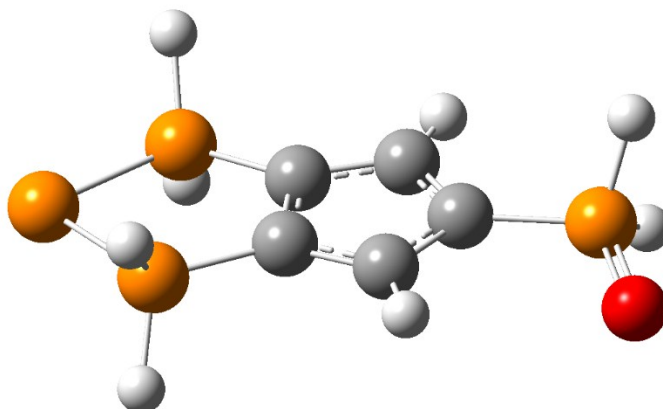

1\1\GINC-SAW38\FOpt\RM062X\TZVP\C5H8O1P4\CMACD\30-Sep-2015\0\#\nM062x/

tzvp scf=tight opt freq pop=(full,nbo6read) test\Optimization of [P(C  
p(PH2)3)O] oxide zwitterion\n0,1\P,1.5720136101,-1.5047476679,0.103060  
528\P,3.1317816474,-0.0065309858,-0.0499954657\P,1.5762892135,1.500368  
8889,-0.1054719111\C,0.0022106159,-0.7092817966,0.0531139729\C,0.00292  
66588,0.7095650747,-0.0874680846\C,-1.3204513485,-1.1413393489,0.12583  
38262\C,-1.3195864067,1.149742013,-0.08344668\C,-2.1289210931,0.004410  
8995,0.0401119461\H,-1.686207871,-2.1504952751,0.2405345903\H,-1.65786  
86266,2.1729317904,-0.158336008\P,-3.9148003993,-0.093450795,0.0645168  
973\H,1.6827302546,2.4332720273,0.945775461\H,1.7100764991,2.351730036  
1,-1.2207462352\H,1.694610671,-2.3028324272,1.257354524\H,1.6860018958  
, -2.483180993,-0.9045503797\H,-4.33042071,0.2666507784,-1.2399262146\H  
, -4.3114878385,1.0612254417,0.7851694933\O,-4.4694475226,-1.4004853306  
,0.5509437199\nVersion=EM64L-G09RevD.01\State=1-A\HF=-  
1635.8169409\RMS

D=4.185e-09\RMSF=9.538e-06\Dipole=2.2067803,1.2804909,-0.4572542\Quadrupole=-12.567451,11.939073,0.628378,-11.048655,4.2320712,0.5000082\PG=C01 [X(C5H8O1P4)]\ \@

|                                              |                             |
|----------------------------------------------|-----------------------------|
| Zero-point correction=                       | 0.116179 (Hartree/Particle) |
| Thermal correction to Energy=                | 0.127604                    |
| Thermal correction to Enthalpy=              | 0.128549                    |
| Thermal correction to Gibbs Free Energy=     | 0.076062                    |
| Sum of electronic and zero-point Energies=   | -1635.700762                |
| Sum of electronic and thermal Energies=      | -1635.689337                |
| Sum of electronic and thermal Enthalpies=    | -1635.688392                |
| Sum of electronic and thermal Free Energies= | -1635.740879                |

### Electrostatic Potential

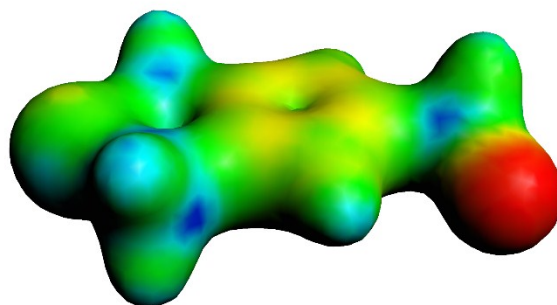

## $P(H_2P)_2C_5H_2P(S)H_2$ model

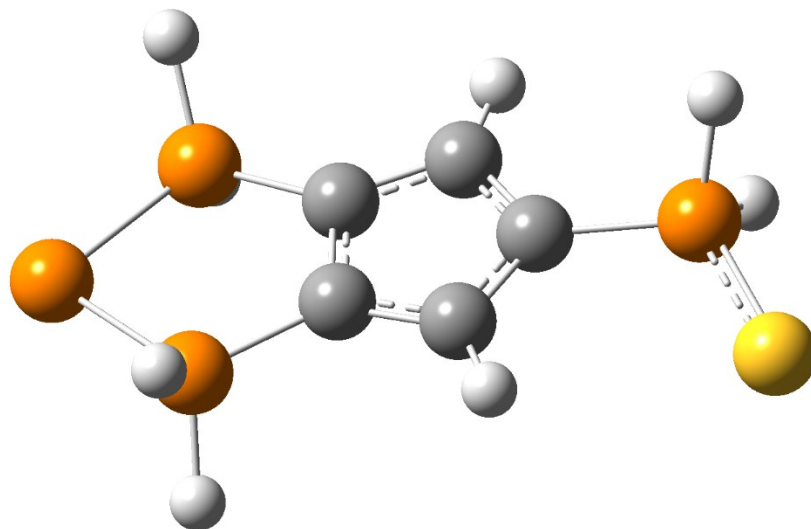

1\1\GINC-SAW52\FOpt\RM062X\TZVP\C5H8P4S1\CMACD\30-Sep-2015\0\#\#  
M062x/

TZVP scf=tight opt freq pop=(full,nbo6read) test\Optimization of [P(C  
p(PH2)3)S] sulfide zwitterion\0,1\P,1.5764938673,-1.5020115536,0.1316  
096122\P,3.1324709796,-0.0114940303,-0.1004414587\P,1.5784696998,1.495  
6349919,-0.1624992807\C,0.0063158026,-0.7091279407,0.0668513195\C,0.00  
45823378,0.7047759739,-0.1108887661\C,-1.3144740919,-1.141255903,0.167  
0157396\C,-1.3172322476,1.1444205685,-0.1058608492\C,-2.1228016975,0.0  
007889146,0.0590120512\H,-1.6800331925,-2.1475152259,0.3073561126\H,-1  
.659412196,2.1636358432,-0.2085464594\P,-3.9164738804,-0.0502483411,0.  
1048271364\H,1.6929408171,2.4491228402,0.8690824953\H,1.6991658592,2.3  
238493521,-1.2953455365\H,1.7107169696,-2.2532645535,1.3157200683\H,1.  
6817100549,-2.5188429131,-0.8380555896\H,-4.3227595396,0.4368176413,-1  
.1576896988\H,-4.2594625138,1.05839169,0.9124212715\S,-4.7255017386,-1  
.7641574243,0.6204824224\Version=EM64L-G09RevD.01\State=1-A\HF=-1958.  
7800991\RMSD=5.164e-09\RMSF=2.314e-06\Dipole=2.400365,1.396644,-0.3982

164\Quadrupole=-12.3586199,12.3594267,-0.0008068,-10.3448633,3.4019045  
,-0.478375\PG=C01 [X(C5H8P4S1)]\ \@

Zero-point correction= 0.114515 (Hartree/Particle)

Thermal correction to Energy= 0.126205

Thermal correction to Enthalpy= 0.127149

Thermal correction to Gibbs Free Energy= 0.073787

Sum of electronic and zero-point Energies= -1958.665584

Sum of electronic and thermal Energies= -1958.653894

Sum of electronic and thermal Enthalpies= -1958.652950

Sum of electronic and thermal Free Energies= -1958.706312

### Electrostatic Potential

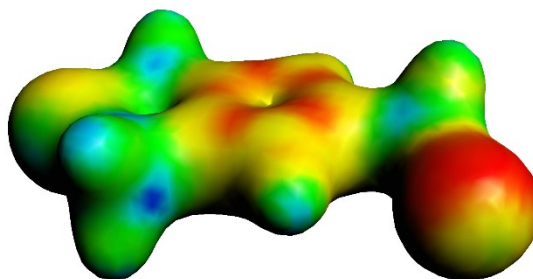



## $P(H_2P)_2C_5H_2P(BH_3)H_2$ model

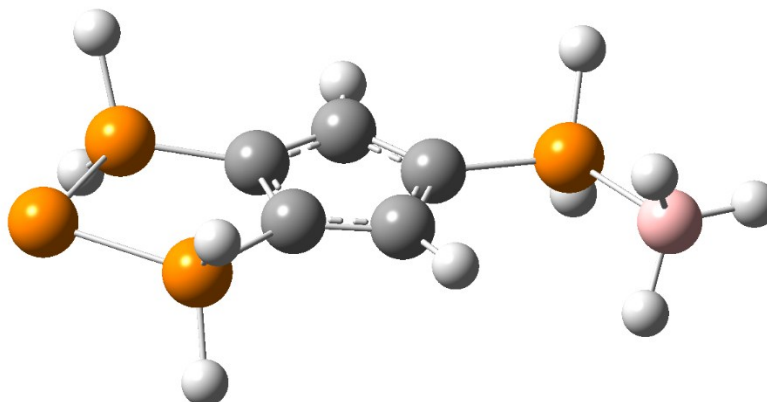

1\1\GINC-SAW76\FOpt\RM062X\TZVP\C5H11B1P4\CMACD\30-Sep-2015\0\#\nM062x

```
/TZVP scf=tight opt freq pop=(full,nbo6read) test\Optimization of [P(\n\nCp(PH2)3)BH3] borane adduct zwitterion\0,1\P,-0.0211255995,0.12430273\n87,0.4347055102\P,2.0702603814,-0.0380793259,-0.1122550652\P,2.0650764\n141,2.0966615462,-0.4808350585\C,-0.530370996,1.8008101381,0.269931576\n6\C,0.4678846058,2.7432503936,-0.1142284433\C,-1.7251060657,2.48809483\n41,0.4724690705\C,-0.118436908,4.0052449421,-0.1668561758\C,-1.4687266\n254,3.8436419943,0.2000435927\H,-2.678809156,2.0828192119,0.7760568946\n\H,0.3655841599,4.9323729669,-0.4355964379\P,-2.7464902002,5.098909739\n9,0.3315368994\H,3.0641773204,2.7672371613,0.25203319\H,2.4517080017,2\n.4171162464,-1.7973922662\H,-0.2703647977,-0.3612128791,1.7342941172\H\n,-0.8414315942,-0.7309140211,-0.3262561327\H,-2.674939242,5.8086795438\n,-0.8835869426\H,-2.2064258421,6.0759135192,1.193186138\B,-4.512184159\n1,4.4428114144,0.8158443096\H,-4.7863990062,3.673357371,-0.0713462881\H\nH,-5.2058769383,5.4260820304,0.8521159943\H,-4.3393857028,3.9188452539
```

,1.8885709372\\Version=EM64L-G09RevD.01\\State=1-A\\HF=-  
1587.2218363\\RMS

D=8.775e-09\\RMSF=4.610e-06\\Dipole=2.6297648,-0.6822138,-0.5201269\\Quad  
rupole=-13.0313784,10.6719963,2.359382,12.3324354,1.2010692,-4.5052192

\\PG=C01 [X(C5H11B1P4)]\\@

Zero-point correction= 0.142949 (Hartree/Particle)

Thermal correction to Energy= 0.155733

Thermal correction to Enthalpy= 0.156678

Thermal correction to Gibbs Free Energy= 0.101559

Sum of electronic and zero-point Energies= -1587.078887

Sum of electronic and thermal Energies= -1587.066103

Sum of electronic and thermal Enthalpies= -1587.065159

Sum of electronic and thermal Free Energies= -1587.120277

### Electrostatic Potential

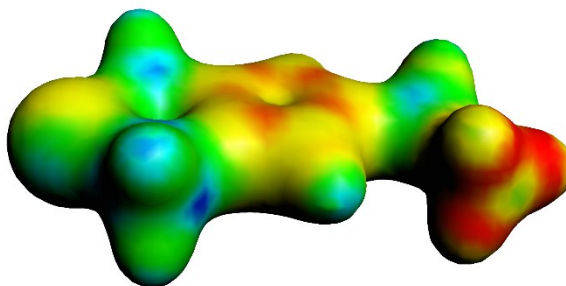

**P(H<sub>2</sub>P)<sub>2</sub>C<sub>5</sub>H<sub>2</sub>P(CH<sub>3</sub>)H<sub>2</sub> model**

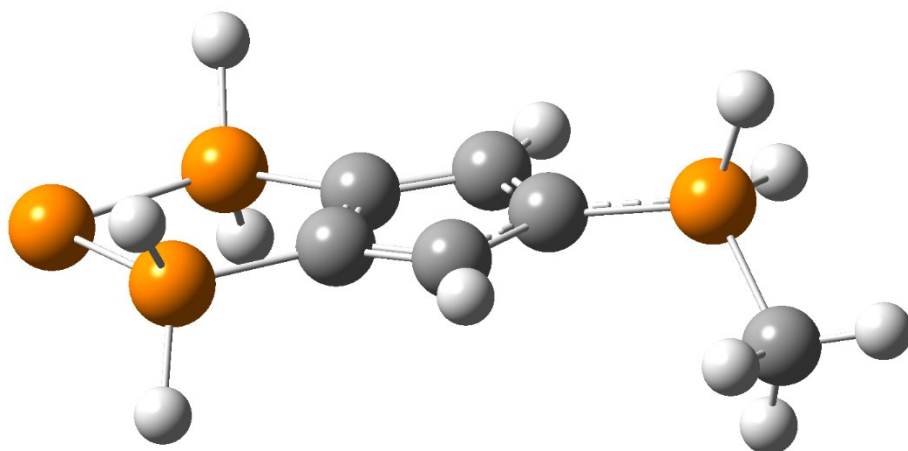

1\1\GINC-SAW215\FOpt\RM062X\TZVP\C6H11P4(1+)\CMACD\01-Oct-2015\0\#\# M0

62x/TZVP scf=tight opt freq pop=(full,nbo6read) test\Optimization of  
[P(Cp(PH2)3)CH3] methylated cation\1,1\P,-0.01099758,0.0292929103,0.0  
880868764\P,2.1487051881,0.0235622883,-0.0553030857\P,2.1001565343,2.1  
877296921,-0.0654592066\C,-0.5884300879,1.7128545837,0.0417863298\C,0.  
405201168,2.726724817,-0.0352484907\C,-1.8386535938,2.3096255362,0.078  
9630601\C,-0.218377563,3.9642974018,-0.0462433502\C,-1.6077217749,3.70  
52986701,0.0261019359\H,-2.7948416795,1.8112959057,0.1332698907\H,0.25  
37406718,4.9339377646,-0.0962993542\P,-2.8429198941,4.9421547655,-0.00  
68760705\H,2.7959242928,2.7812479117,1.0050693195\H,2.7543797222,2.749  
9434526,-1.1782817118\H,-0.5116106568,-0.5998592542,1.2429037083\H,-0.  
6365101888,-0.7099043002,-0.9330517734\H,-3.50012133,5.0679713626,-1.2  
430847931\H,-2.2274614008,6.186572351,0.1798666135\C,-4.1390556854,4.7  
352127724,1.2387497866\H,-4.6250649249,3.7726961205,1.0829103538\H,-4.  
8751211034,5.5328631972,1.1476958046\H,-3.6826020638,4.7524268709,2.22

68795767\\Version=EM64L-G09RevD.01\State=1-A\HF=-  
1600.2700727\RMSD=5.4

34e-09\RMSF=6.047e-06\Dipole=-2.186539,2.0032121,0.1910243\Quadrupole=  
11.7375502,7.5869848,-19.324535,-12.0985067,-2.7982975,0.525314\PG=C01

[X(C6H11P4)]\ \@

Zero-point correction= 0.150971 (Hartree/Particle)

Thermal correction to Energy= 0.162374

Thermal correction to Enthalpy= 0.163318

Thermal correction to Gibbs Free Energy= 0.112023

Sum of electronic and zero-point Energies= -1600.119102

Sum of electronic and thermal Energies= -1600.107699

Sum of electronic and thermal Enthalpies= -1600.106754

Sum of electronic and thermal Free Energies= -1600.158049

### Electrostatic Potential

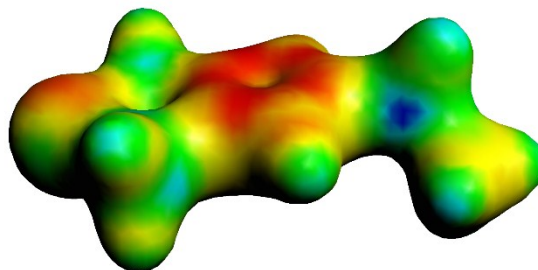

**[P(H<sub>2</sub>PCH<sub>2</sub>CH<sub>2</sub>PH<sub>2</sub>)] cation model**

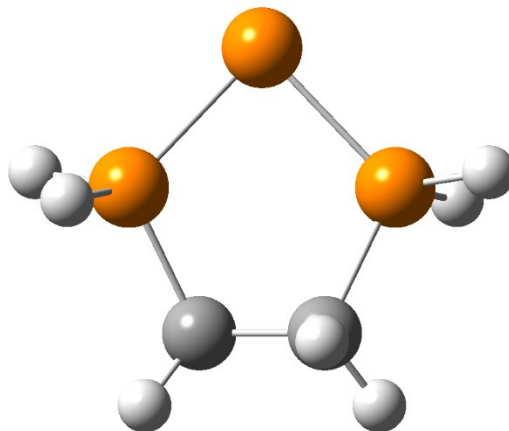

1\1\GINC-SAW79\FOpt\RM062X\TZVP\C2H8P3(1+)\CMACD\02-Jun-2015\0\#\nM062

```
x/TZVP scf=tight opt freq pop=(full,nbo6read) test\Optimization of [P
(dHpe)] cation\1,1\P,0.0000417394,-2.6793916749,-0.0001176252\P,1.398
1617574,-1.1226426049,-0.5163736556\P,-1.3980511753,-1.122671065,0.516
3085372\C,0.5308135091,0.5020920684,-0.5486435446\C,-0.530715773,0.502
0731751,0.5486045091\H,-1.2494406531,1.3100975502,0.4108666387\H,-0.08
26574128,0.6001755001,1.538378314\H,0.0827546957,0.6002057584,-1.53841
58681\H,1.2495276798,1.3101230931,-0.4108878402\H,-2.0044590682,-1.291
6926864,1.7724753102\H,-2.5052707011,-0.9807451649,-0.3423063083\H,2.5
053339555,-0.9807338347,0.3423073979\H,2.0046369368,-1.2916171942,-1.7
725127252\Version=EM64L-G09RevD.01\State=1-A\HF=-
1104.7489336\RMSD=3.
672e-09\RMSF=2.864e-05\Dipole=0.0000085,1.3694838,0.0000623\Quadrupole
=5.7988971,-2.434916,-3.3639811,0.0001105,-4.5007131,0.0000522\PG=C01
[X(C2H8P3)]\@\n
```

|                                              |                             |
|----------------------------------------------|-----------------------------|
| Zero-point correction=                       | 0.098120 (Hartree/Particle) |
| Thermal correction to Energy=                | 0.103877                    |
| Thermal correction to Enthalpy=              | 0.104822                    |
| Thermal correction to Gibbs Free Energy=     | 0.068202                    |
| Sum of electronic and zero-point Energies=   | -1104.650813                |
| Sum of electronic and thermal Energies=      | -1104.645056                |
| Sum of electronic and thermal Enthalpies=    | -1104.644112                |
| Sum of electronic and thermal Free Energies= | -1104.680731                |

### Electrostatic Potential

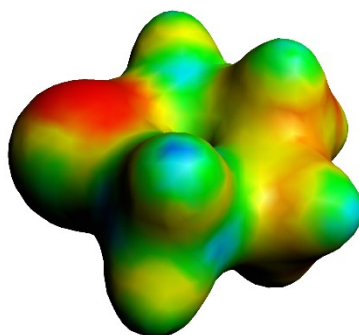

### LUMO

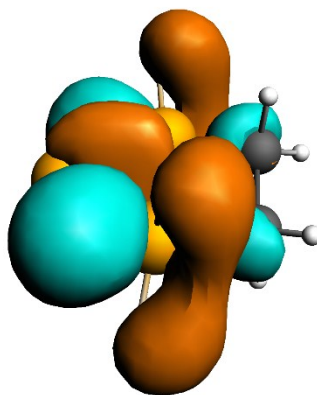

**HOMO**

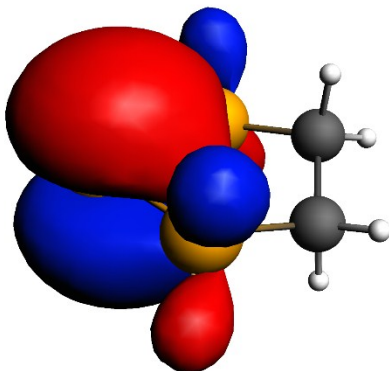

**HOMO-1**

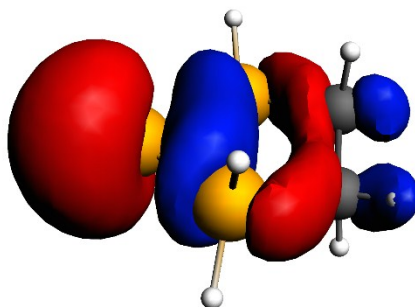

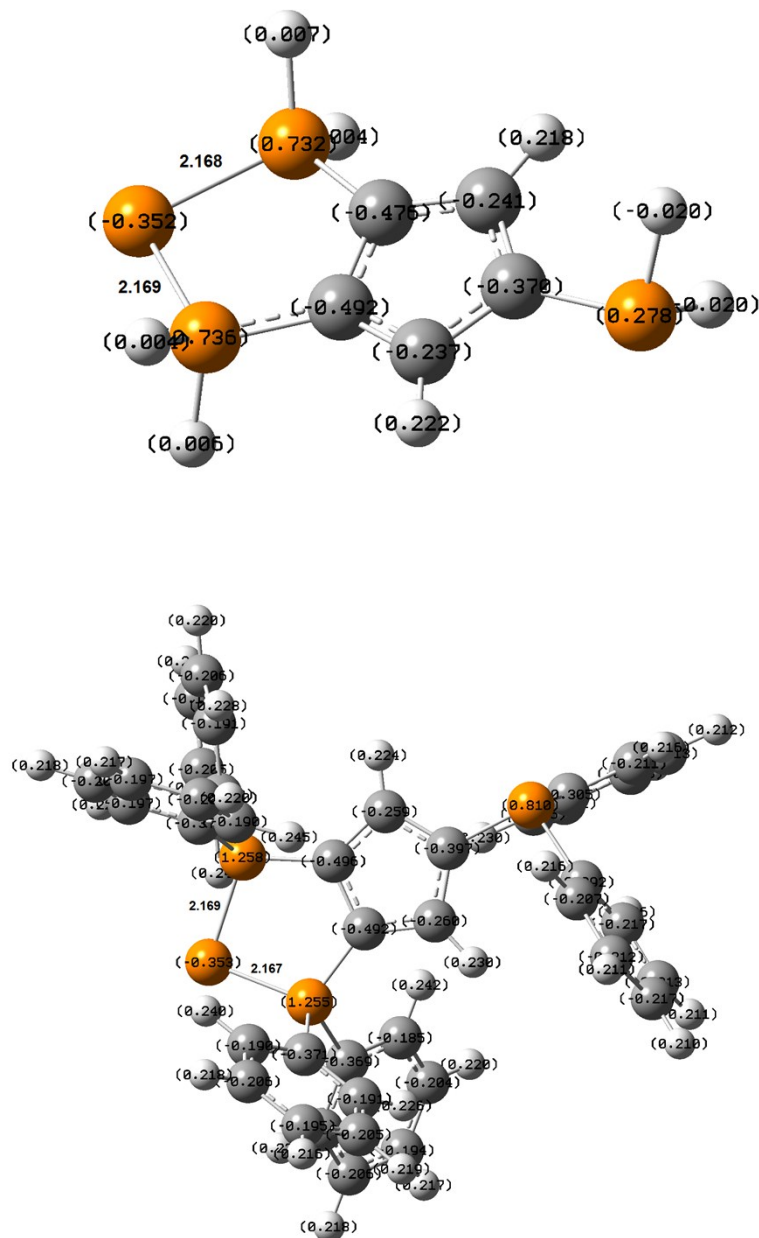

**Fig. 16 NBO Charges and selected bond lengths of 1' (above) and 1 (below)**  
**References**

1. M. J. Frisch, G. W. Trucks, H. B. Schlegel, G. E. Scuseria, M. A. Robb, J. R. Cheeseman, G. Scalmani, V. Barone, B. Mennucci, G. A. Petersson, H. Nakatsuji, M. Caricato, X. Li, H. P. Hratchian, A. F. Izmaylov, J. Bloino, G. Zheng, J. L. Sonnenberg, M. Hada, M. Ehara, K. Toyota, R. Fukuda, J. Hasegawa, M. Ishida, T. Nakajima, Y. Honda, O. Kitao, H. Nakai, T. Vreven, J. Montgomery, J. A., J. E. Peralta, F. Ogliaro, M. Bearpark, J. J. Heyd, E. Brothers, K. N. Kudin, V. N. Staroverov, R. Kobayashi, J. Normand, K. Raghavachari, A. Rendell, J. C. Burant, S.



- S. Iyengar, J. Tomasi, M. Cossi, N. Rega, N. J. Millam, M. Klene, J. E. Knox, J. B. Cross, V. Bakken, C. Adamo, J. Jaramillo, R. Gomperts, R. E. Stratmann, O. Yazyev, A. J. Austin, R. Cammi, C. Pomelli, J. W. Ochterski, R. L. Martin, K. Morokuma, V. G. Zakrzewski, G. A. Voth, P. Salvador, J. J. Dannenberg, S. Dapprich, A. D. Daniels, Ö. Farkas, J. B. Foresman, J. V. Ortiz, J. Cioslowski and D. J. Fox, *Gaussian09, Revision D01*, (2009) Gaussian, Inc., Wallingford CT.
2. Y. Zhao and D. G. Truhlar, *Theor. Chem. Acc.*, 2008, **120**, 215-241.
  3. A. Schafer, C. Huber and R. Ahlrichs, *J. Chem. Phys.*, 1994, **100**, 5829-5835.
  4. *Gaussview 3.0*, (2003) Gaussian Inc., Pittsburgh, PA.
  5. A. E. Reed, L. A. Curtiss and F. Weinhold, *Chem. Rev.*, 1988, **88**, 899-926.
  6. G. te Velde, F. M. Bickelhaupt, E. J. Baerends, C. F. Guerra, S. J. A. Van Gisbergen, J. G. Snijders and T. Ziegler, *J. Comput. Chem.*, 2001, **22**, 931-967.
  7. C. F. Guerra, J. G. Snijders, G. te Velde and E. J. Baerends, *Theor. Chem. Acc.*, 1998, **99**, 391-403.
  8. *ADF 2014*, (2014) SCM, Theoretical Chemistry, Vrije Universiteit, Amsterdam, The Netherlands.
